# Supplementary material
Source: publisher figshare collection journal article supplement (https://acs.figshare.com/ndownloader/files/9351952)
Supplement: Supplementary file 1 [file 9351952]

# Supporting information

## Localized surface plasmon resonance-mediated charge trapping/detrapping for core-shell nanorod-based optical memory cells

Li Zhou,<sup>a,b</sup> Su-Ting Han,<sup>\*a</sup> Shiwei Shu,<sup>a,b</sup> Jiaqing Zhuang,<sup>c</sup> Yan Yan,<sup>a</sup> Qi-Jun Sun,<sup>c</sup>  
Ye Zhou,<sup>\*a</sup> and V. A. L. Roy<sup>\*c</sup>

<sup>a</sup> College of Electronics Science & Technology and Institute for Advanced Study, Shenzhen University, Shenzhen, China.

\*Email: [sutinghan@szu.edu.cn](mailto:sutinghan@szu.edu.cn); [yezhou@szu.edu.cn](mailto:yezhou@szu.edu.cn)

<sup>b</sup> Key Laboratory of Optoelectronic Devices and Systems of Ministry of Education and Guangdong Province, College of Optoelectronic Engineering, Shenzhen University, Shenzhen, China.

<sup>c</sup> Department of Physics and Materials Science, City University of Hong Kong, Hong Kong, China.

\*E-mail: [val.roy@cityu.edu.hk](mailto:val.roy@cityu.edu.hk)

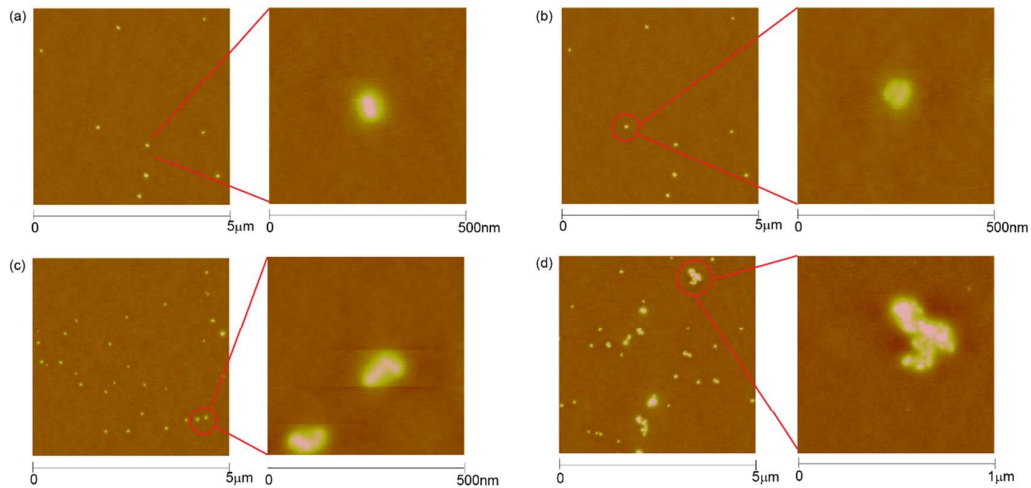

**Figure S1.** AFM image of (a) NRs-2, (b) NRs-5, (c) NRs-10, (d) NRs-20 films. (Right: small scale)

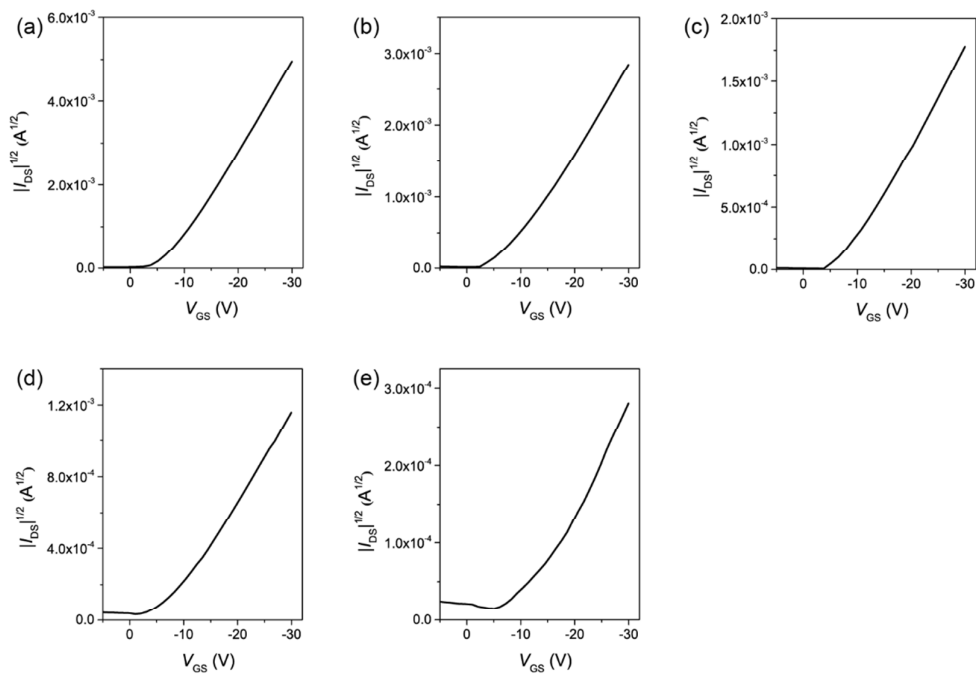

**Figure S2** The transfer curves of (a) PVPy, (b) NRs-2, (c) NRs-5, (d) NRs-10, (e) NRs-20 devices at initial state.

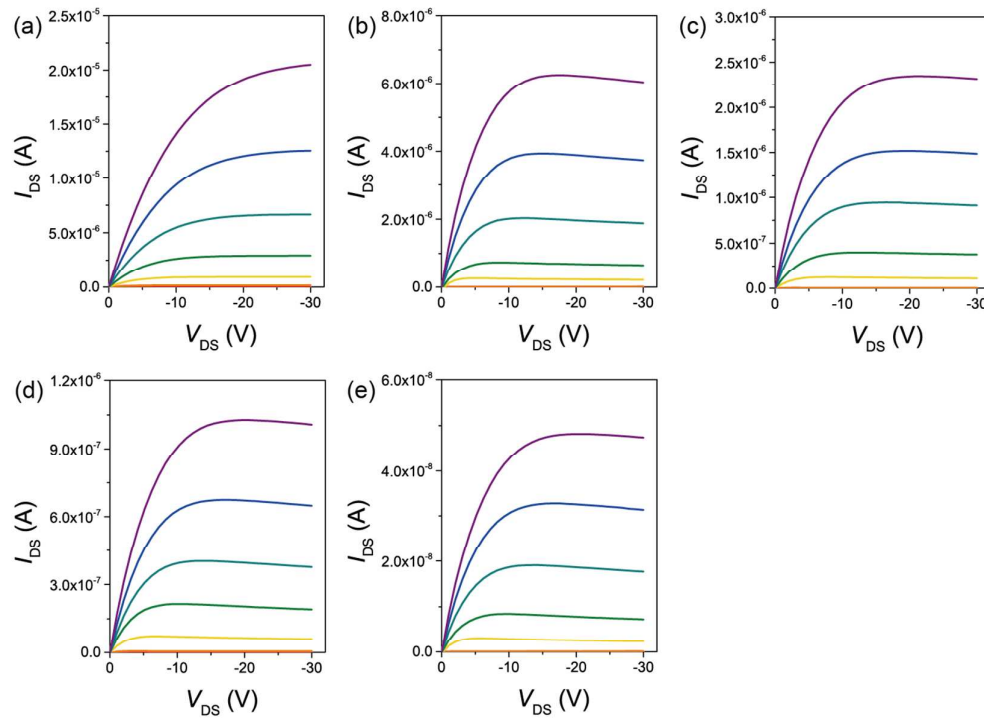

**Figure S3** The output curves of (a) PVPy, (b) NRs-2, (c) NRs-5, (d) NRs-10, (e) NRs-20 devices at initial state.

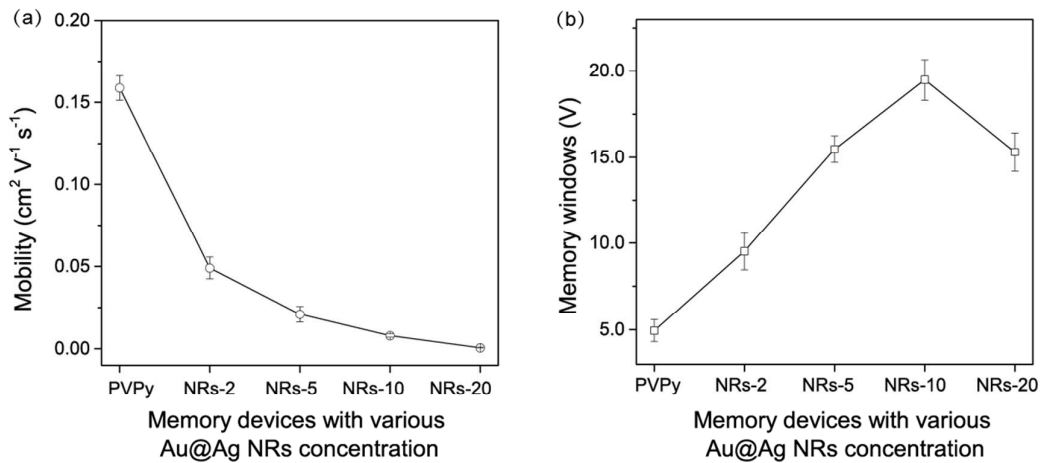

**Figure S4** The device statistics of mobility (a) and memory window (b) with various nanorods concentration.

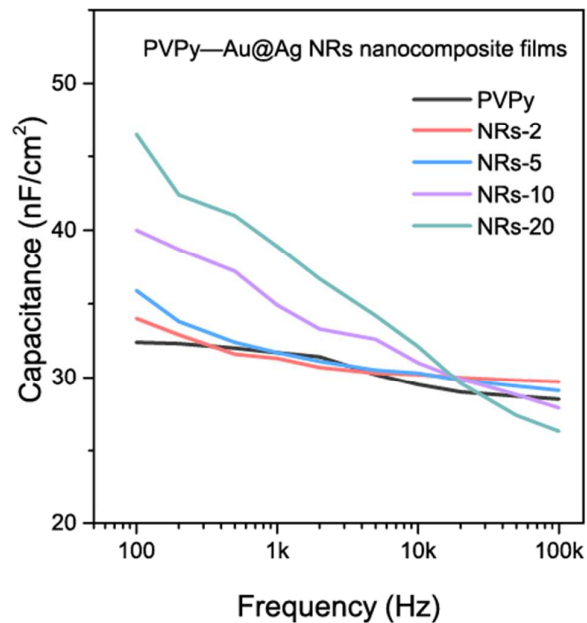

**Figure S5** Capacitance per unit area of nanocomposite dielectrics with respect to various frequencies.

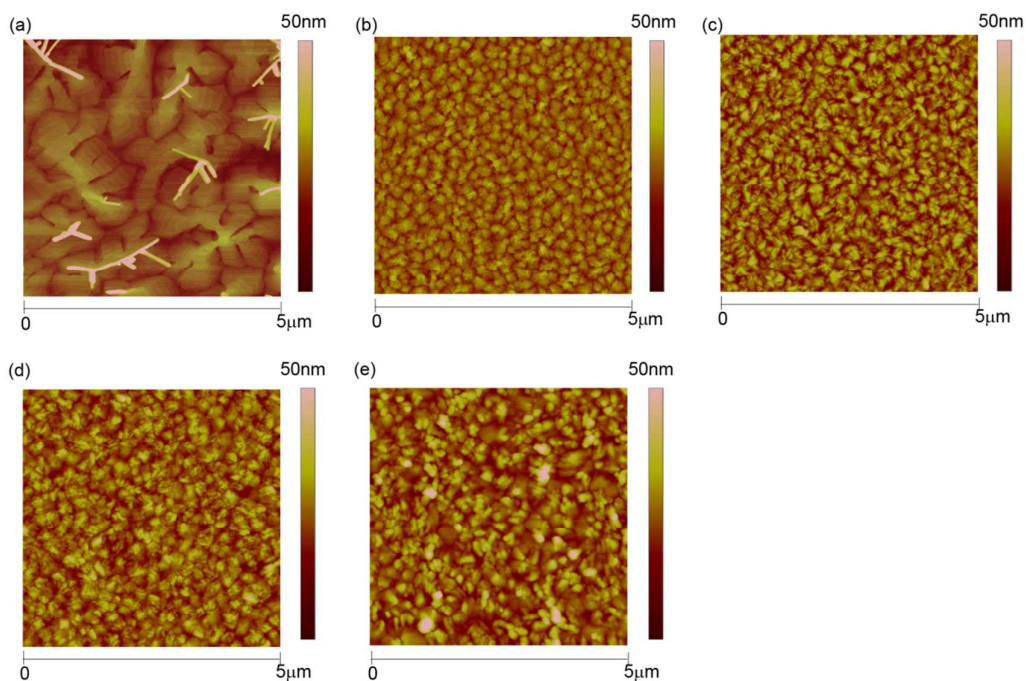

**Figure S6** AFM images of pentacene films deposited on (a) PVPy, (b) NRs-2, (c) NRs-5, (d) NRs-10, (e) NRs-20.

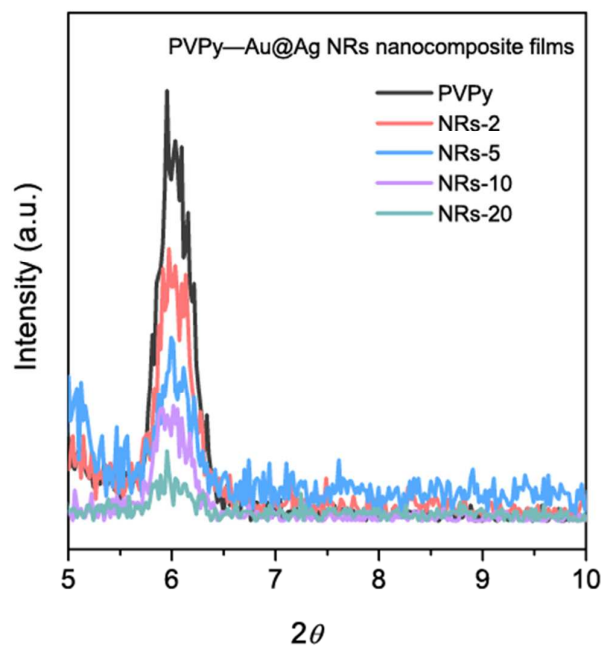

**Figure S7** XRD patterns of pentacene films deposited on various nanocomposite films.

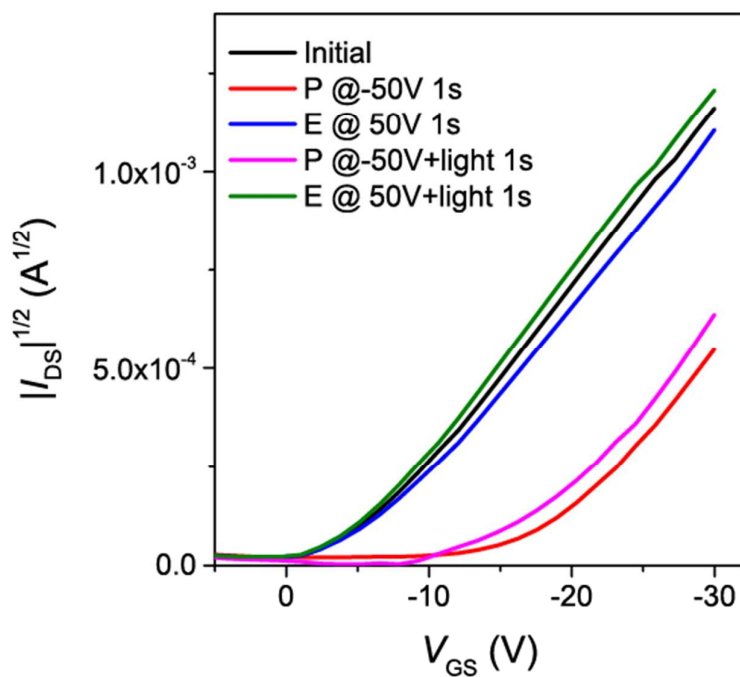

**Figure S8** Transfer curve of memory device based on Au NRs with/without light illumination.

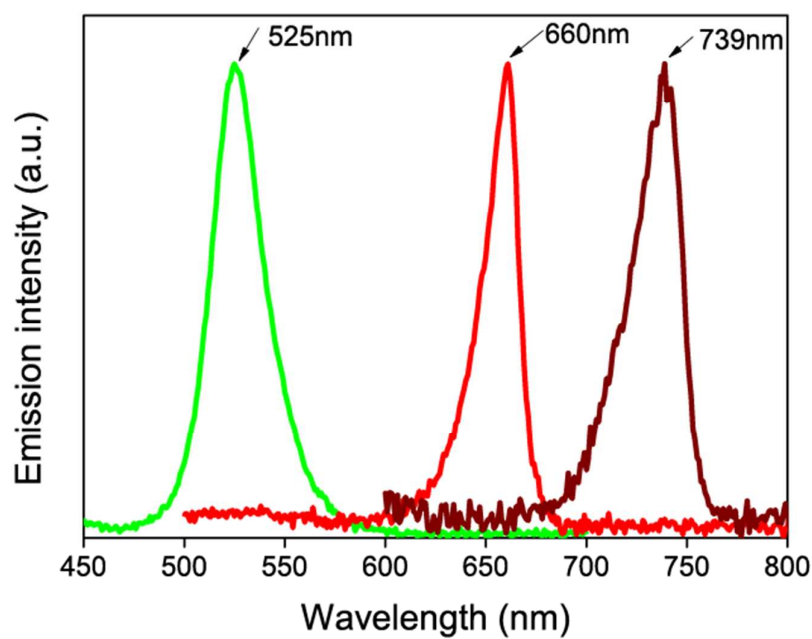

**Figure S9** Emission spectra of various light source.

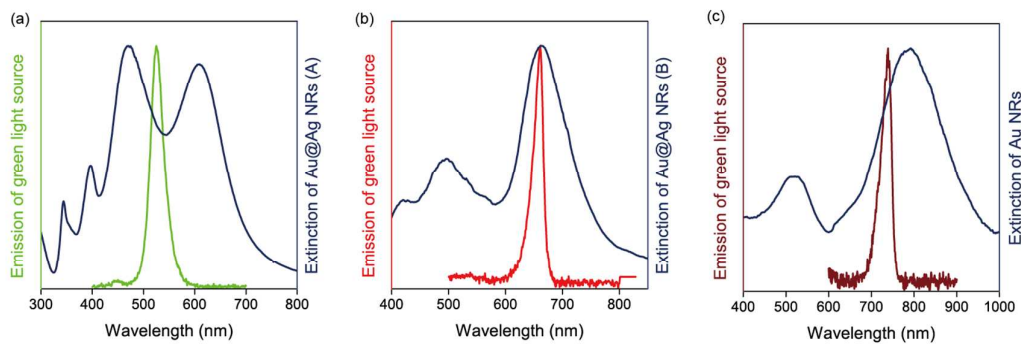

**Figure S10** Normalized emission spectra of various light source and extinction spectra of NRs.

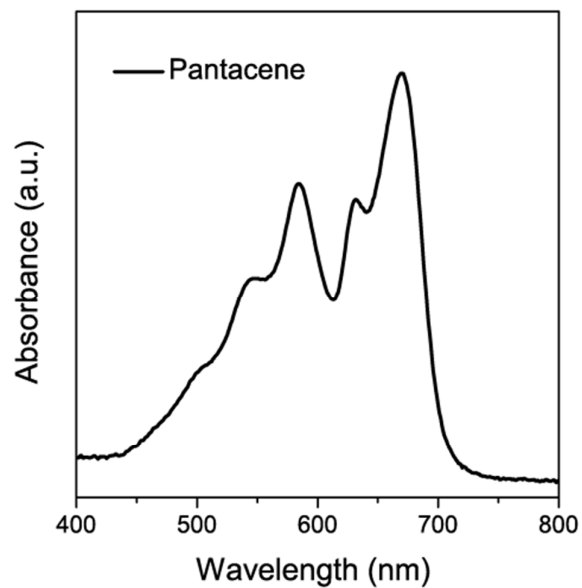

**Figure S11** Absorption spectrum of pentacene thin film.

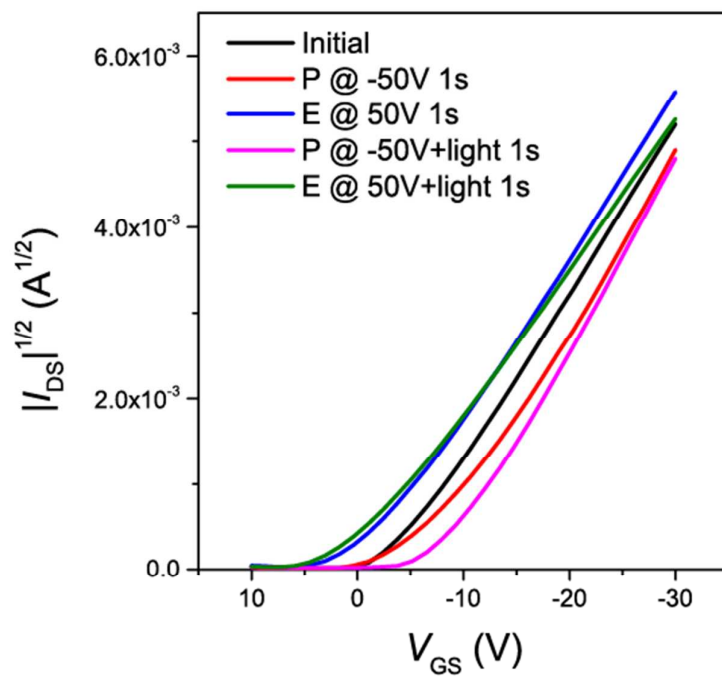

**Figure S12** Transfer curve of memory device based on pristine PVPy film with/without light illumination.
